# Supplementary material
Source: publisher site journal article supplement (https://www.dovepress.com/article/422300)
Supplement: Supplementary file 1 [file get_supplementary_file.php]

Supplementary Materials for

**Transarterial Chemoembolization for Patients with Unresectable Hepatocellular Carcinoma with Child-Pugh B7**

Jian-Qiang Jiang, Jin-Tao Huang, Bin-Yan Zhong, Wei-Dong Wang, Jun-Hui Sun, Qi Wang, Wen-Bin Ding, Cai-Fang and Xiao-Li Zhu

Correspondence to: Xiao-Li Zhu ([zhuxiaoli90@163.com](mailto:zhuxiaoli90@163.com)) or Bin-Yan Zhong (byzhongir@sina.com)

**This file includes:**

**Table S1-S3**

**Figure S1 to S4**

**Table S1-S3**

**Table S1. Univariate and multivariate analysis of risk factors for overall survival.**

| Characteristics | Univariate analysis | | |  | Multivariate analysis | | |
| --- | --- | --- | --- | --- | --- | --- | --- |
| HR | 95% CI | *P* value | HR | 95% CI | *P* value |
| Child-Pugh class (B vs. A) | 1.467 | 1.044-2.061 | 0.027 |  | 1.551 | 1.103-2.182 | 0.012 |
| Gender (female vs. male) | 0.907 | 0.642-1.282 | 0.581 |  | - |  |  |
| Age | 1.015 | 0.999-1.032 | 0.064 |  | - |  |  |
| ECOG PS (1 vs. 0) | 1.295 | 0.528-3.174 | 0.573 |  | - |  |  |
| Tumor size | 1.637 | 1.309-2.046 | <0.001 |  | 1.675 | 1.336-2.094 | <0.001 |
| No. of nodules | 1.101 | 0.901-1.345 | 0.346 |  | - |  |  |
| HBV (yes vs. no) | 1.059 | 0.750-1.494 | 0.747 |  | - |  |  |
| BCLC (B vs. A) | 1.368 | 0.958-1.955 | 0.085 |  | - |  |  |
| CNLC | 1.137 | 0.976-1.324 | 0.099 |  | - |  |  |
| TACE type (DEB-TACE vs. cTACE) | 0.656 | 0.162-2.653 | 0.555 |  | - |  |  |
| AFP (>200 vs. ≤200) | 1.480 | 1.065-2.058 | 0.020 |  | - |  |  |

ECOG, Eastern Cooperative Oncology Group; BCLC, Barcelona Clinic Liver Cancer; CNLC, China liver cancer; TACE, transarterial chemoembolization; DEB-TACE, drug-eluting beads transarterial chemoembolization; cTACE, conventional transarterial chemoembolization; AFP, alpha-fetoprotein.

**Table S2. Best overall response of CP-A/B (score of 7) patients with TACE therapy according to mRECIST before and after propensity score matching (PSM).**

|  | Before PSM | | P value | After PSM | | P value |
| --- | --- | --- | --- | --- | --- | --- |
| CP-A  n=780 | CP-B (7)  n=45 | CP-A  n=134 | CP-B (7)  n=45 |
| Best response |  |  |  |  |  |  |
| CR | 127 (16.3%) | 7 (15.6%) |  | 21 (15.7%) | 7 (15.6%) |  |
| PR | 327 (41.9%) | 16 (35.5%) |  | 50 (37.3%) | 16 (35.5%) |  |
| SD | 138 (17.7%) | 13 (28.9%) |  | 26 (19.4%) | 13 (28.9%) |  |
| PD | 188 (24.1%) | 9 (20.0%) |  | 37 (27.6%) | 9 (20.0%) |  |
| ORR | 454 (58.2%) | 23 (51.1%) | <0.05 | 71 (53.0%) | 23 (51.1%) | <0.05 |
| DCR | 592 (75.9%) | 32 (71.1%) | <0.05 | 97 (72.4%) | 32 (71.1%) | <0.05 |

CR, complete response; PR, partial response; SD, stable disease; PD, progressive disease; ORR, objective response rate, DCR, disease control rate; ORR=CR+PR; DCR=CR+PR+SD.

**Table S3. Outcomes and adverse events of CP-A/B (score of 7) patients with TACE therapy before and after propensity score matching (PSM).**

| Adverse Events | Before PSM | | P value | After PSM | | P value |
| --- | --- | --- | --- | --- | --- | --- |
| CP-A  n=780 | CP-B (7)  n=45 | CP-A  n=134 | CP-B (7)  n=45 |
| Fever | 406 (52.1%) | 23 (51.1%) | <0.05 | 68 (50.7%) | 23 (51.1%) | <0.05 |
| Pain | 312 (40.0%) | 19 (42.2%) | <0.05 | 53 (39.6%) | 19 (42.2%) | <0.05 |
| Nausea | 218 (27.9%) | 14 (31.1%) | <0.05 | 37 (27.6%) | 14 (31.1%) | <0.05 |
| Vomiting | 203 (26.0%) | 13 (28.9%) | <0.05 | 36 (26.9%) | 13 (28.9%) | <0.05 |
| Liver enzyme abnormalities | 404 (51.8%) | 24 (53.3%) | <0.05 | 69 (51.5%) | 24 (53.3%) | <0.05 |

**Figure S1-S4**

Figure S1


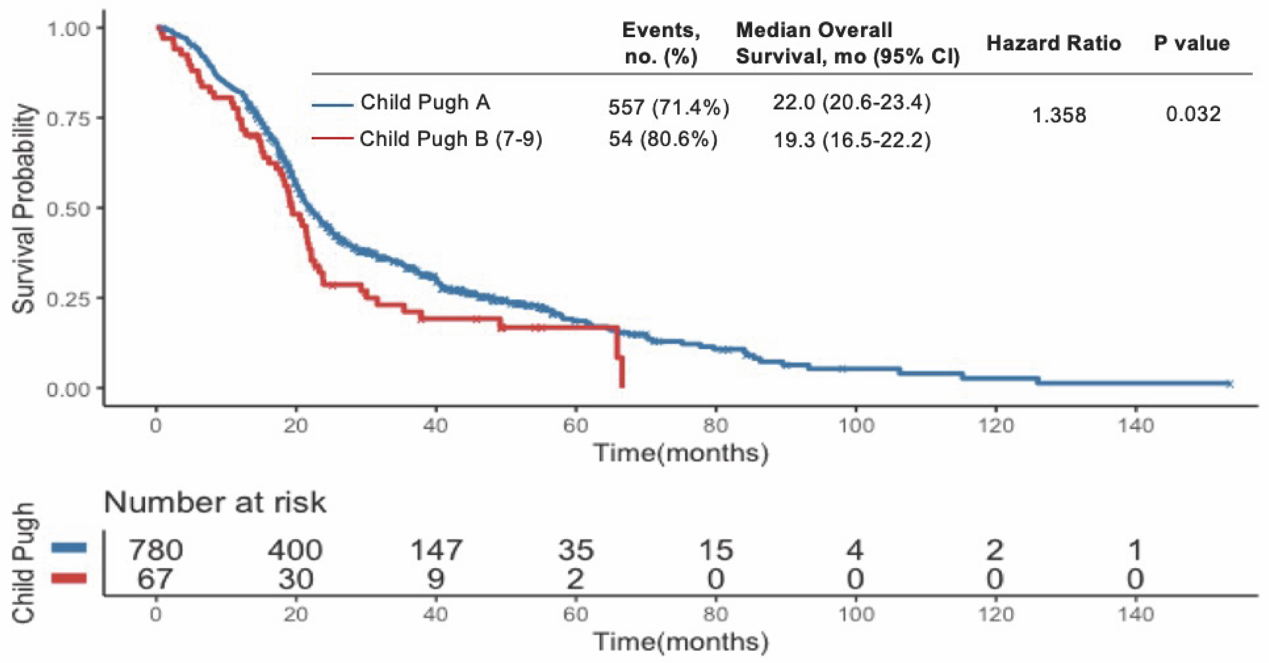


Figure S2


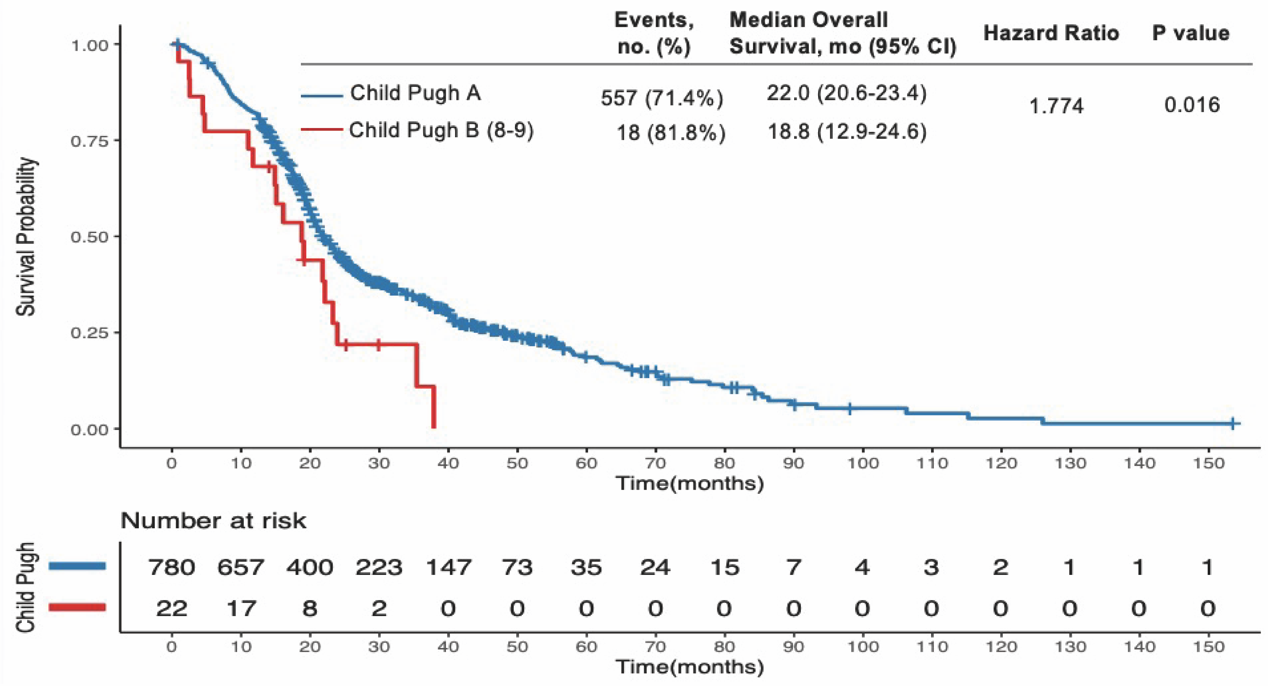


Figure S3


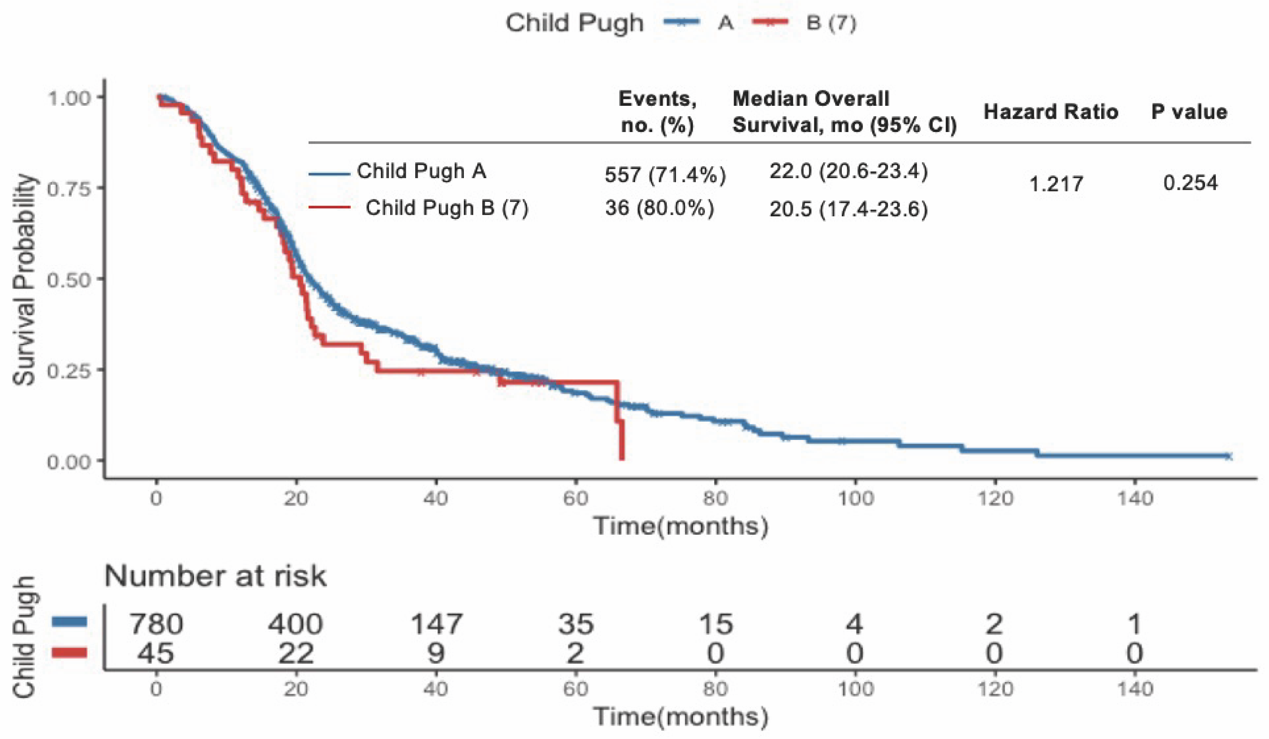


Figure S4


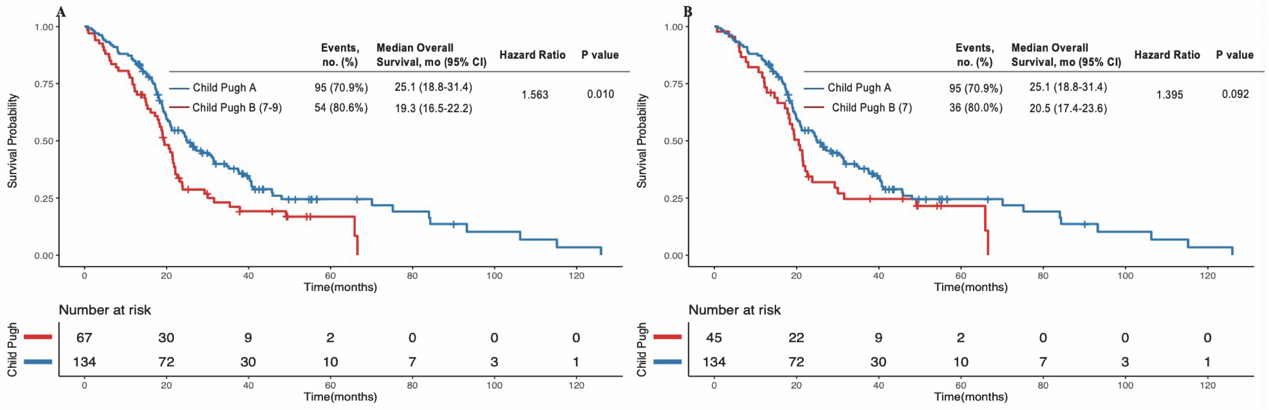


**Figure Legends**

**Figure S1:** Kaplan–Meier survival curves stratified by the Child-Pugh class [Child-Pugh A vs Child-Pugh B (score of 7-9)] before propensity score matching.

**Figure S2:** Kaplan–Meier survival curves stratified by the Child-Pugh class [Child-Pugh A vs Child-Pugh B (score of 8-9)] before propensity score matching.

**Figure S3:** Kaplan–Meier survival curves stratified by the Child-Pugh class [Child-Pugh A vs Child-Pugh B (score of 7)] before propensity score matching.

**Figure S4:** Kaplan–Meier survival curves stratified by the Child-Pugh class [Child-Pugh A vs Child-Pugh B (score of 7-9/7)] after propensity score matching (sensitivity analyses).
